# Supplementary material for: COVID-19 mortality in the UK Biobank cohort: revisiting and evaluating risk factors
Source: Springer Nature journal article supplement (doi:10.1007/s10654-021-00722-y), 2021-02-15
Supplement: 10654_2021_722_MOESM1_ESM.pdf [file 10654_2021_722_MOESM1_ESM.pdf]

## Supplementary Information

### COVID-19 mortality in the UK Biobank cohort: revisiting and evaluating risk factors

Dr Joshua Elliott<sup>a,b,c,†</sup>; Ms Barbara Bodinier<sup>a,b,†</sup>; Mr Matthew Whitaker<sup>a,b</sup>; Dr Cyrille Delpierre<sup>d</sup>; Prof. Ioanna Tzoulaki<sup>a,b,e</sup>; Prof. Roel Vermeulen<sup>f</sup>; Prof. Paul Elliott<sup>a,b,‡</sup>; Prof. Marc Chadeau-Hyam<sup>a,b,‡</sup>

<sup>a</sup> Department of Epidemiology and Biostatistics, School of Public Health, Imperial College London, London, UK

<sup>b</sup> MRC Centre for Environment and Health, Imperial College, London, UK

<sup>c</sup> Royal Surrey County Hospital, Guildford, Surrey, GU2 7XX

<sup>d</sup> UMR LEASP, Université de Toulouse III, UPS, Inserm, Toulouse, France

<sup>e</sup> Department of Hygiene and Epidemiology, University of Ioannina Medical School, Ioannina, Greece

<sup>f</sup> Institute for Risk Assessment Sciences (IRAS), Utrecht University, Utrecht, The Netherlands

<sup>†</sup> Joint first authors

<sup>‡</sup> Joint last authors

## Variable definition

### *Demographics*

Age was calculated using the year and month of birth (UK Biobank fields 34 and 52) as of 31 January 2020, when COVID-19 was first diagnosed in the UK. Sex is as defined in field 31. Ethnicity was recoded in three categories from field 21000: White (British, Irish or any other White background), Black (including Caribbean and African background) and Other (Mixed, Asian or other ethnic background).

### *Social factors*

Highest attained qualification is retrieved from field 6138. The housing variables are encoded in fields 670, 680, and 709. The household income (field 738) is recoded in four balanced categories. Occupation is defined from the job code based on the SOC2000 classification (field 132) and the employment status (field 6142) entered at baseline, and recoded as: employed (in paid employment or self-employed) healthcare workers (including health professionals, health and social welfare associate professionals, healthcare and related personal services, health and social service managers and hospital porters), employed non-healthcare workers, unemployed (including studying and doing unpaid voluntary work), and retired.

### *Health risk factors*

Smoking and alcohol drinking status are used as defined in fields 20116 and 20117 respectively. Continuous measurement of the Body Mass Index (BMI) at recruitment is provided in field 21001 and was categorised as: <25, 25–30, 30–40 and >40 kg/m<sup>2</sup>.

### *Biological variables*

Measured levels of total cholesterol in mmol/L (as defined in UK Biobank field ID 30690), high density lipoprotein cholesterol in mmol/L (30760), triglycerides in mmol/L (30870), vitamin D in nmol/L (30890), and cystatin C in mg/L (30720) were taken at baseline.

### *Medical variables*

All codes used to define medical variables are available in Supplementary Table 1. Comorbidities (yes/no) were identified either from nurse-administrated questionnaire data at baseline (UK Biobank fields 20001 and 20002) or linked Hospital Episode Statistics (ICD-9 or ICD-10 codes, censored at 31 March 2017). Cancer included any reported or diagnosed non-benign cancer. Diabetes additionally included those with baseline glycated haemoglobin above or equal to 48 mmol/mol. Medication codes were from self-report (UK Biobank field 20003).

### *Environmental exposures*

Modelled levels of exposures to NO<sub>x</sub>, PM<sub>10</sub>, PM<sub>2.5</sub> absorbance and PM<sub>2.5</sub> were used as defined in fields 24004, 24005, 24007, and 24006.

**Supplementary Figure 1:** Results from the univariate logistic regression models from each covariate separately for the risk of COVID-19 death (in blue) and non-COVID-19 death (in orange). Effect size estimates expressed as odds ratios (ORs) are represented for demographic covariates, and social, health risk, biological, medical, and environmental factors. ORs for continuous variables are standardized to ensure comparability.

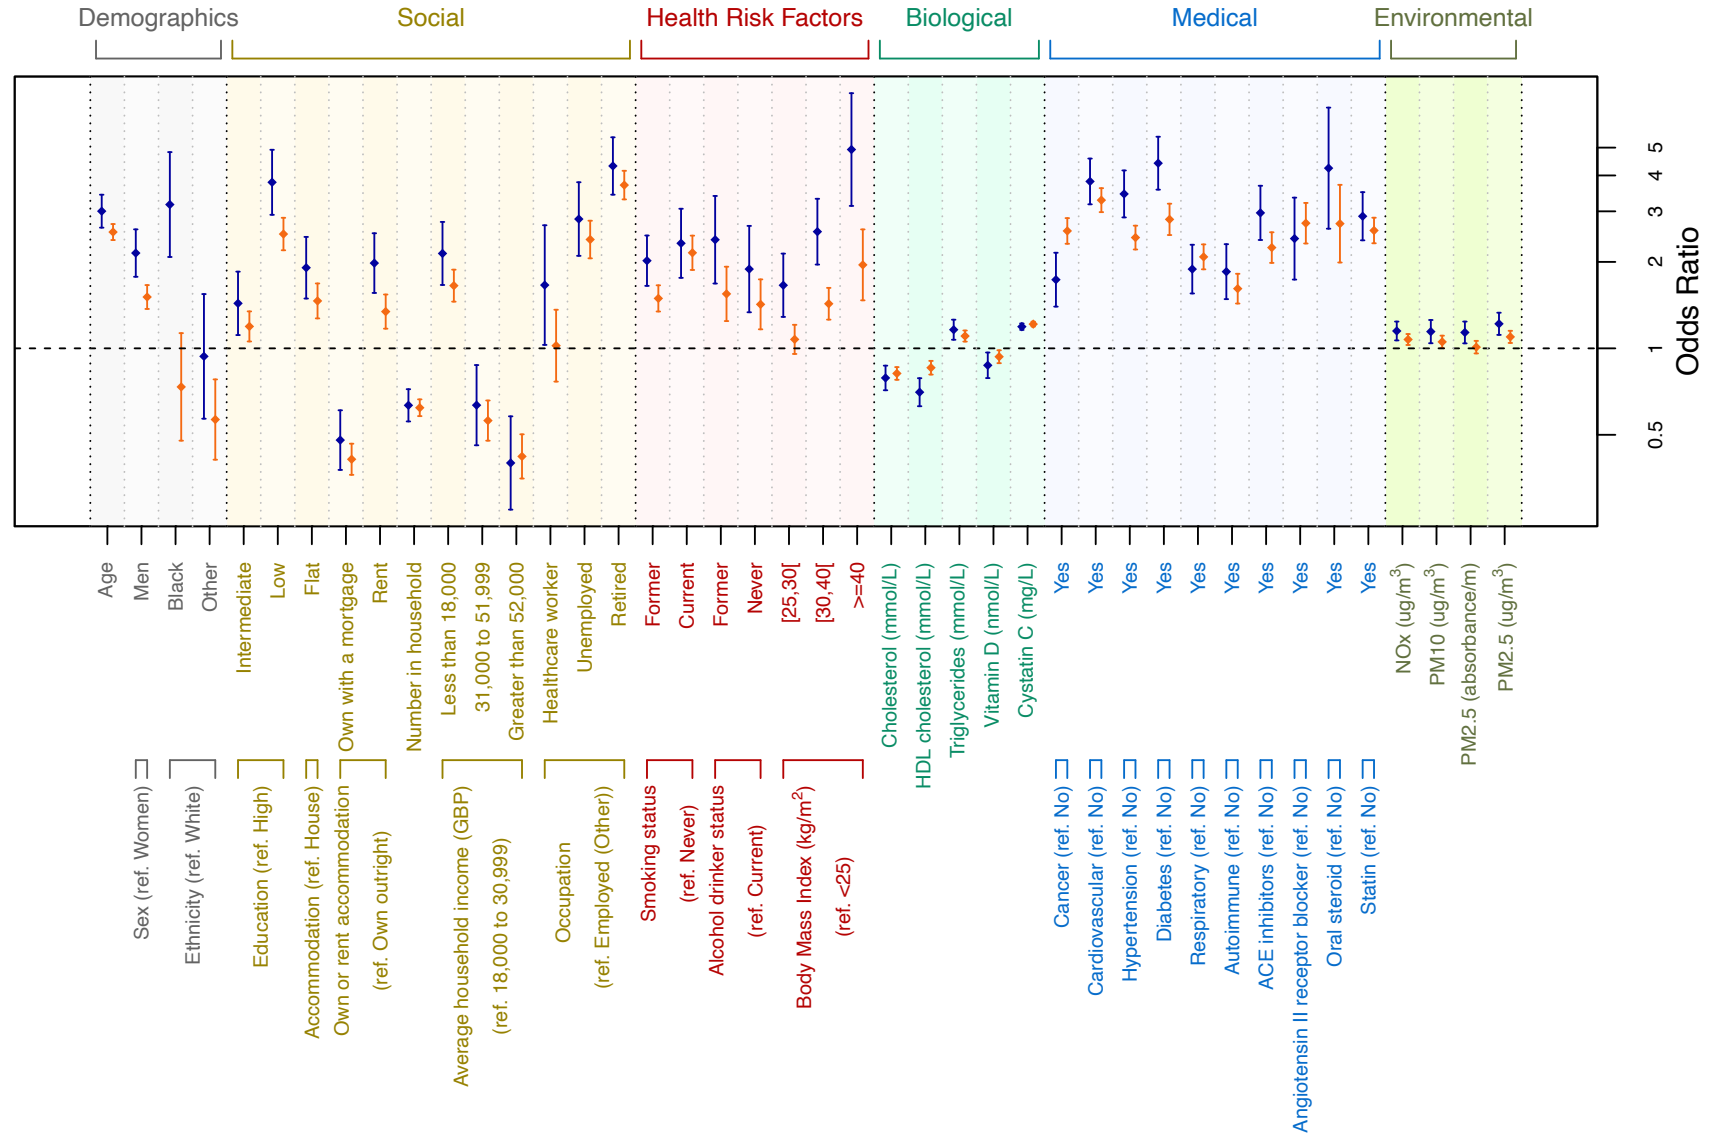

**Supplementary Figure 2:** Comparison of the odds ratio (A) and p-values (B) from the logistic models of the probability of dying from COVID-19, where the cause of death is defined as U07.1 and U07.2 (X-axis, 459 deaths vs. 470,465 participants alive at the end of follow up), or U07.1 only (Y-axis, 438 deaths vs. 470,465 participants alive at the end of follow up) for demographics (in grey, N=4), social (brown, N=12), health risk (red, N=7), biological (green, N=5), medical (blue, N=10), and environmental (olive green, N=4) factors.

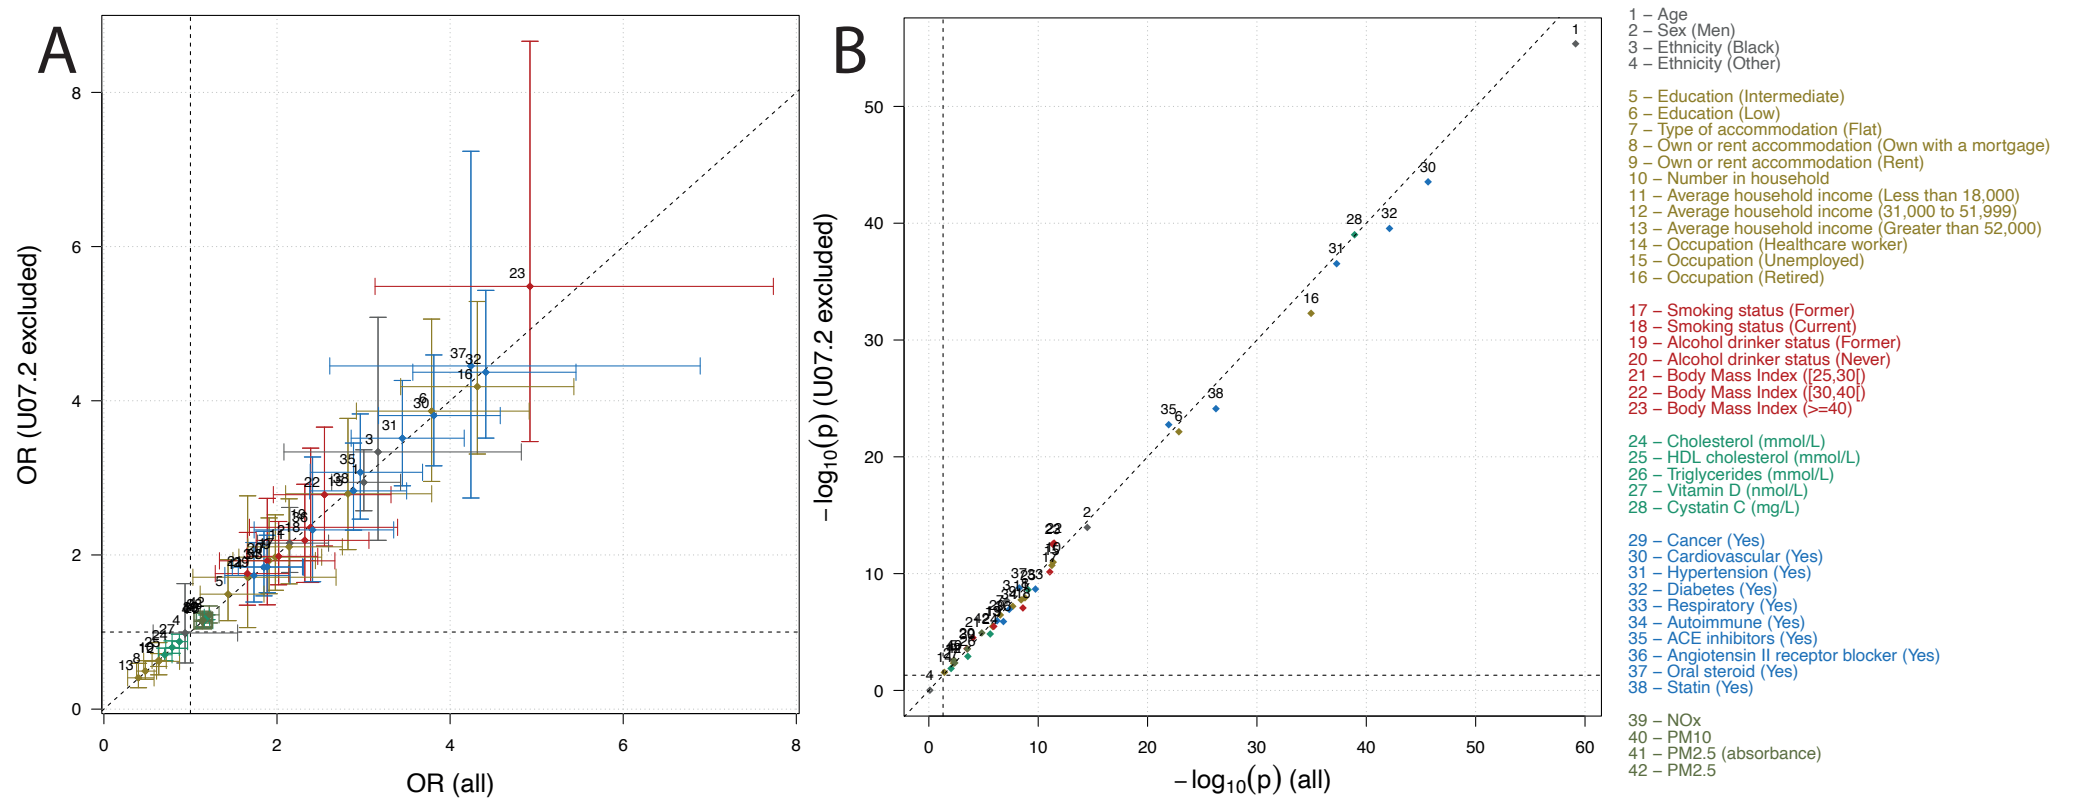

**Supplementary Figure 3.** Odds ratio [95% confidence intervals] from logistic models for risk of COVID-19 death (in blue) and non-COVID-19 death during the same period (in orange). Results are presented for sequentially adjusted models: demographic (Model 1), with additional adjustment for social (Model 2), health risk (Model 3), biological (Model 4), medical (Model 5), and environmental factors (Model 6).

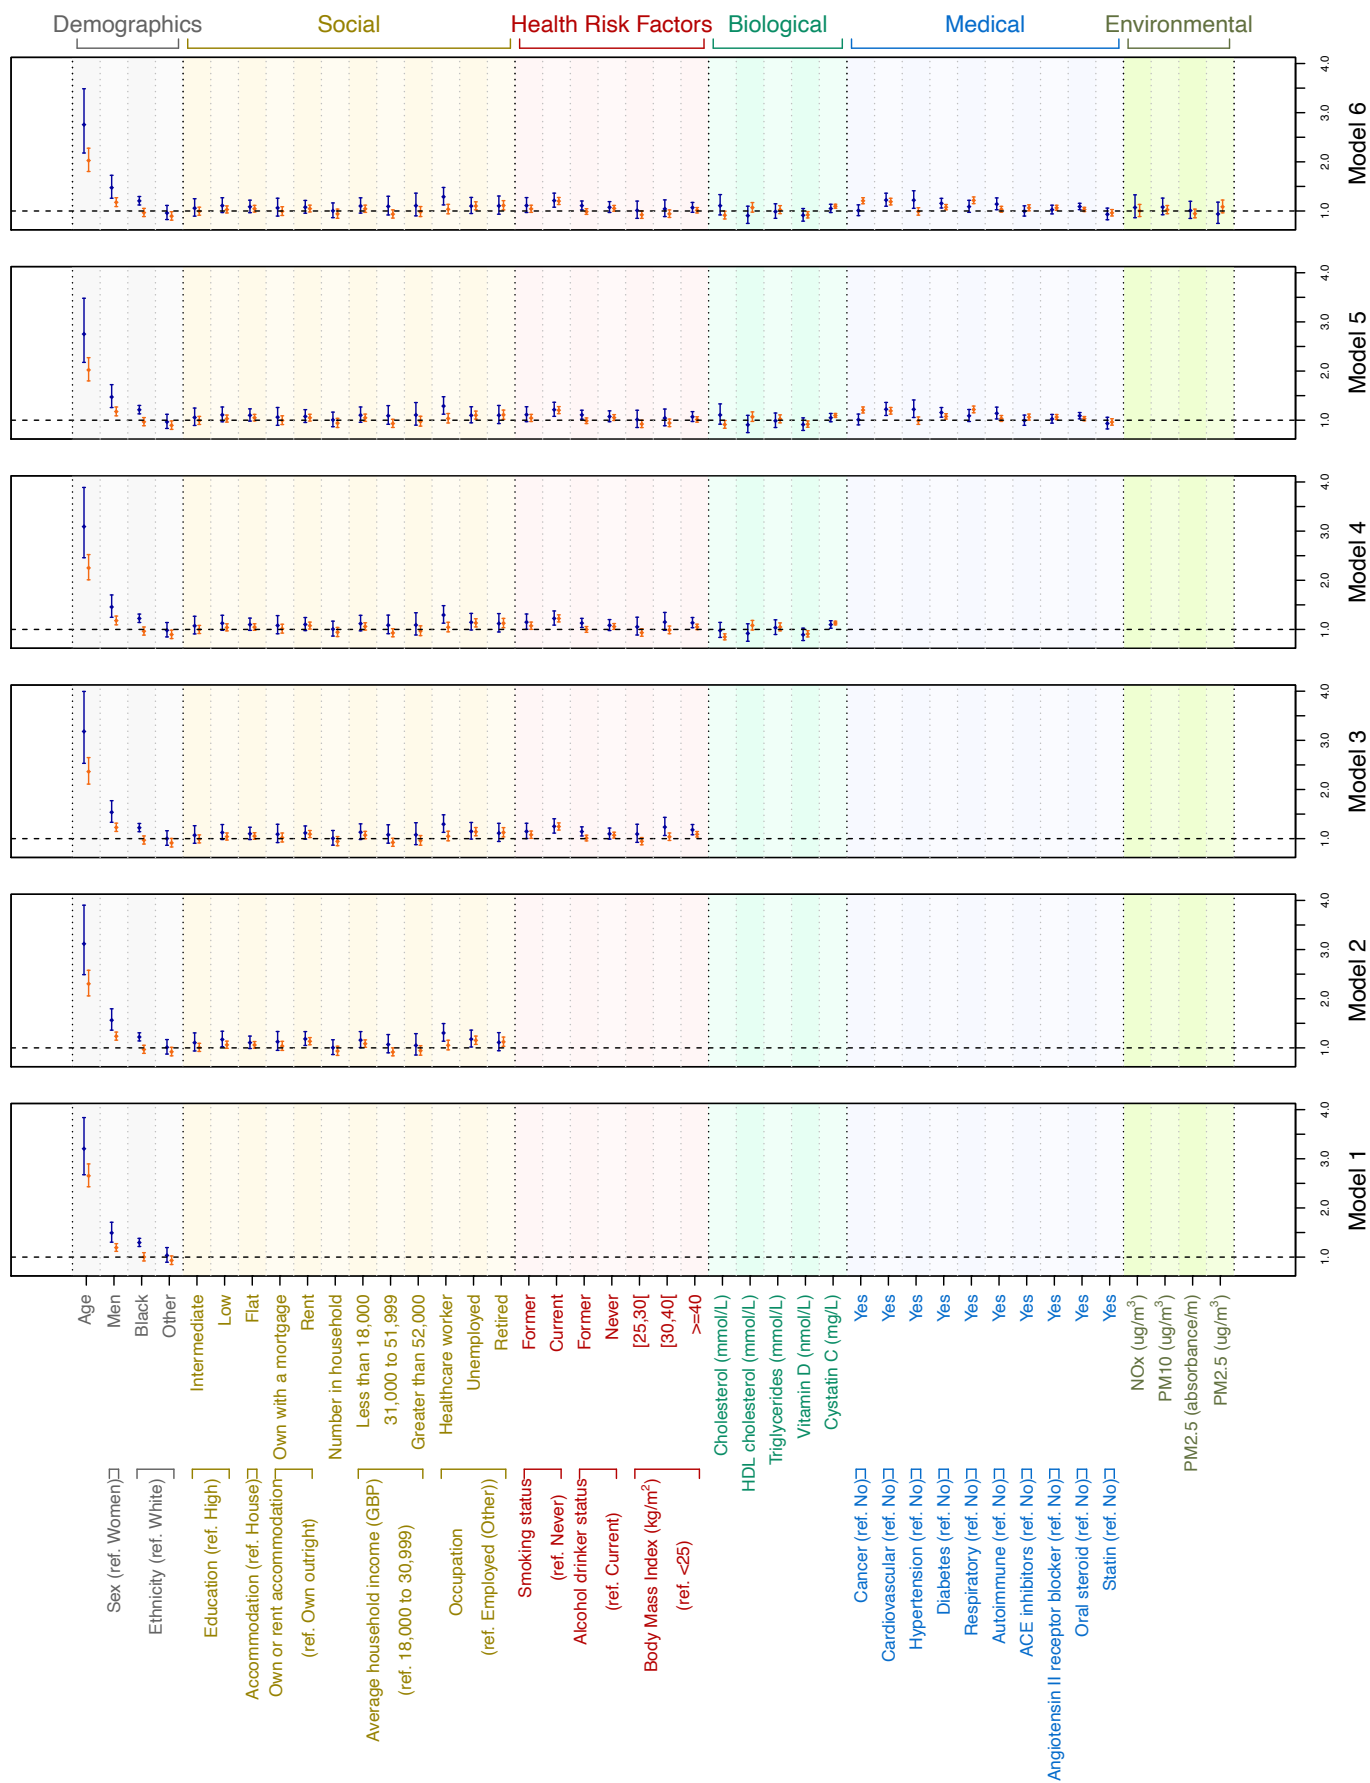

**Supplementary Figure 4:** Receiver operating characteristic (ROC) curves from logistic regression models for the risk of non-COVID-19 death between 31 January and 21 September 2020. ROC curves are presented for a logistic model including (N=4) demographics covariates (grey) and the (N=12) factors consistently selected by the logistic LASSO (purple). Predictive performances were derived from a subsampling procedure (repeated independently 1,000 times) of 80% of the study population as training set to produce ROC curves and corresponding AUC in the validation set (remaining 20%). The ROC curve and AUC point estimate corresponds to mean performance across the 1,000 subsamples, and the coloured areas (and AUC ranges) reflect the 1<sup>st</sup> and 99<sup>th</sup> percentiles of the performances yielded across the subsamples.

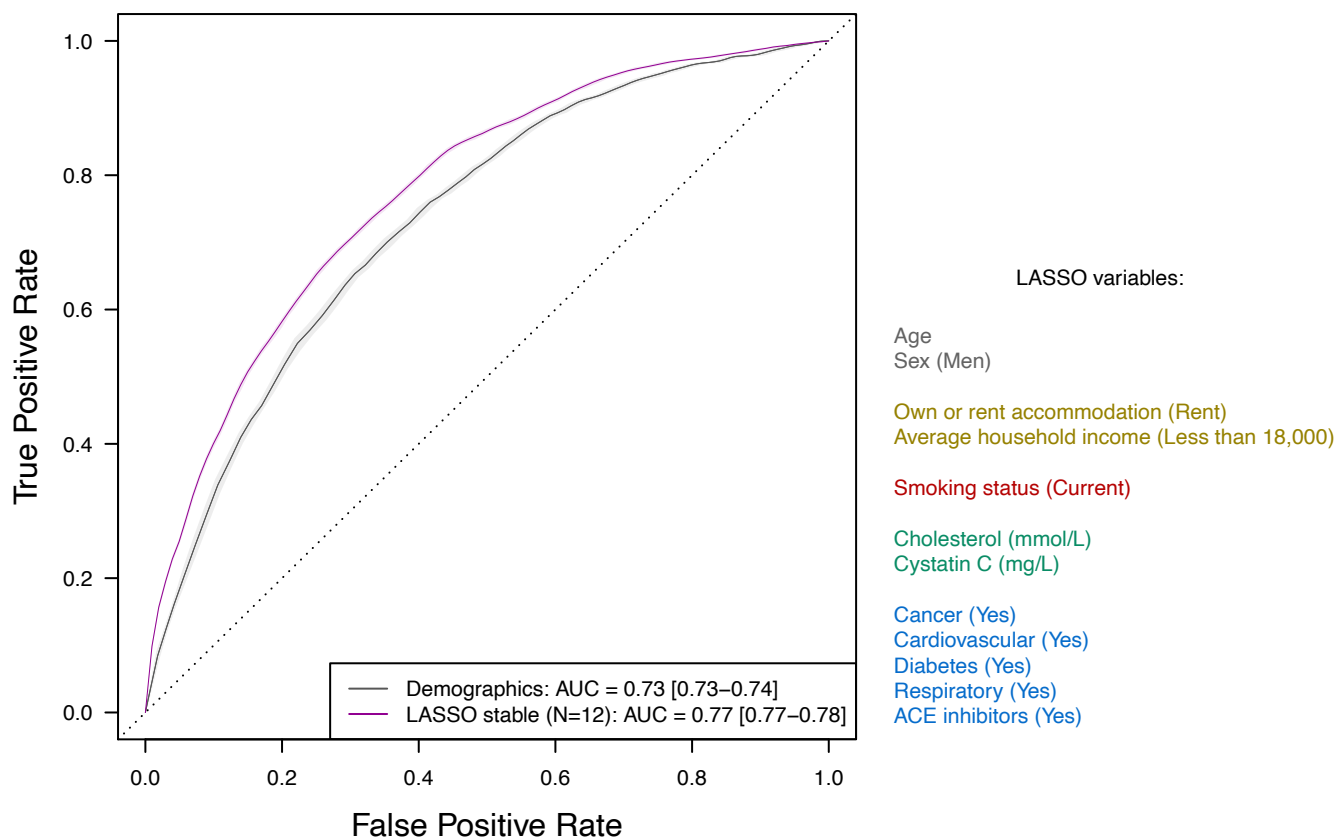

**Supplementary Table 1.** Codes for (A) comorbidities using UK Biobank data coding 3 and 6 (self-report, UK Biobank fields 20001 and 20002) and linkage to Hospital Episode Statistics (ICD-9 and ICD-10) and (B) medication use at baseline (data coding 4, UK Biobank field 20003).

**A**

| Field<br>20001 | Cancer  |         |                | Cardiovascular |             |                | Hypertension |         |                | Diabetes |       |                | Respiratory |         | Autoimmune (1/2) |        |        | Autoimmune (2/2) |        |       |
|----------------|---------|---------|----------------|----------------|-------------|----------------|--------------|---------|----------------|----------|-------|----------------|-------------|---------|------------------|--------|--------|------------------|--------|-------|
|                | ICD-10  | ICD-9   | Field<br>20002 | ICD-10         | ICD-9       | Field<br>20002 | ICD-10       | ICD-9   | Field<br>20002 | ICD-10   | ICD-9 | Field<br>20002 | ICD-10      | ICD-9   | Field<br>20002   | ICD-10 | ICD-9  | Field<br>20002   | ICD-10 | ICD-9 |
| Any            | C00-C09 | 140-149 | 1066           | I00-I02        | 390-392     | 1065           | I10-I15      | 401-405 | 1220           | E10      | 250   | 1111           | J30-J39     | 470-478 | 1224             | D68.3  | 286.5  | 1435             | L40    | 710   |
|                | C15-C26 | 150-159 | 1067           | I05-I09        | 393-398     | 1072           |              |         | 1222           | E11      |       | 1112           | J40-J47     | 480-488 | 1225             | D68.4  | 286.7  | 1453             | L43    | 720.0 |
|                | C30-C39 | 160-165 | 1068           | I20-I25        | 410-414     |                |              |         | 1223           | E12      |       | 1113           | J60-J70     | 490-496 | 1226             | D68.5  | 289.81 | 1461             | L63.9  | 720.8 |
|                | C40-C41 | 170-176 | 1074           | I26-I28        | 415-417     |                |              |         |                | E13      |       | 1114           | J80-J84     | 500-508 | 1228             | D69.3  | 287.31 | 1462             | L80    | 281.0 |
|                | C43-C44 | 179-189 | 1075           | I30-I52        | 420-429     |                |              |         |                | E14      |       | 1115           | J85-J86     | 510-519 | 1234             | D86    | 135    | 1463             | L90.0  |       |
|                | C45-C49 | 190-199 | 1076           | I60-I69        | 430-438     |                |              |         |                |          |       | 1117           | J90-J94     |         | 1256             | D89    | 245.2  | 1464             | M05    |       |
|                | C50     | 200-209 | 1077           | I70-I76        | 440-445     |                |              |         |                |          |       | 1120           | J95-J99     |         | 1260             | E06.3  | 340    | 1475             | M06    |       |
|                | C51-C58 | 230-234 | 1078           | I77.0-I77.5    | 447.0-447.5 |                |              |         |                |          |       | 1121           |             |         | 1261             | E27.1  | 357.81 | 1477             | M07    |       |
|                | C60-C63 | 235-238 | 1079           | I77.7-I77.9    | 447.7-447.9 |                |              |         |                |          |       | 1122           |             |         | 1313             | E27.2  | 358    | 1480             | M08    |       |
|                | C64-C68 | 239     | 1080           | I78-I79        | 448-449     |                |              |         |                |          |       | 1123           |             |         | 1331             | G35    | 377.3  | 1481             | M30    |       |
|                | C69-C72 |         | 1081           | I81-I82        | 453         |                |              |         |                |          |       | 1124           |             |         | 1345             | G61    | 447.6  | 1506             | M31    |       |
|                | C73-C75 |         | 1082           | I95-I99        |             |                |              |         |                |          |       | 1125           |             |         | 1371             | G70    | 555    | 1520             | M32    |       |
|                | C76-C80 |         | 1083           |                |             |                |              |         |                |          |       | 1126           |             |         | 1372             | H46    | 556    | 1522             | M33    |       |
|                | C82-C96 |         | 1086           |                |             |                |              |         |                |          |       |                |             |         | 1376             | I77.6  | 571.6  | 1549             | M34    |       |
|                | C97     |         | 1087           |                |             |                |              |         |                |          |       |                |             |         | 1377             | K50    | 571.42 | 1550             | M35    |       |
|                | D00-D09 |         | 1088           |                |             |                |              |         |                |          |       |                |             |         | 1378             | K51    | 576.1  | 1561             | M45    |       |
|                | D37-D48 |         | 1093           |                |             |                |              |         |                |          |       |                |             |         | 1379             | K74.3  | 579.0  | 1564             | M46.0  |       |
|                |         |         | 1094           |                |             |                |              |         |                |          |       |                |             |         | 1380             | K75.4  | 694    | 1609             | M46.1  |       |
|                |         |         |                |                |             |                |              |         |                |          |       |                |             |         | 1381             | K83.01 | 696    | 1661             | M46.2  |       |
|                |         |         |                |                |             |                |              |         |                |          |       |                |             |         | 1382             | K90.0  | 697.0  | 1667             | M46.4  |       |
|                |         |         |                |                |             |                |              |         |                |          |       |                |             |         | 1383             | L10    | 704.01 |                  | M46.8  |       |
|                |         |         |                |                |             |                |              |         |                |          |       |                |             |         | 1384             | L11    | 709.01 |                  | M46.9  |       |
|                |         |         |                |                |             |                |              |         |                |          |       |                |             |         | 1397             | L12    | 701.0  |                  | N08    |       |
|                |         |         |                |                |             |                |              |         |                |          |       |                |             |         | 1428             | L13    | 714    |                  | D51.0  |       |
|                |         |         |                |                |             |                |              |         |                |          |       |                |             |         | 1426             | L14    | 446    |                  |        |       |

**B**

| Angiotensin-converting enzyme inhibitors |                                                             | Angiotensin II receptor blockers |                                                       | Oral steroids |                                       | Statins    |                             |
|------------------------------------------|-------------------------------------------------------------|----------------------------------|-------------------------------------------------------|---------------|---------------------------------------|------------|-----------------------------|
| Code                                     | Medication                                                  | Code                             | Medication                                            | Code          | Medication                            | Code       | Medication                  |
| 1140860728                               | Quinapril                                                   | 1140916356                       | losartan                                              | 1140868364    | prednisone                            | 1141192410 | rosuvastatin                |
| 1140860738                               | quinalapril+hydrochlorothiazide<br>10mg/12.5mg tablet       | 1140916362                       | cozaar half strength 25mg tablet<br>(losartan)        | 1140874930    | prednisolone                          | 1140861958 | simvastatin                 |
| 1140860752                               | acepril 12.5mg tablet (captopril)                           | 1141145660                       | valsartan                                             | 1140874896    | hydrocortisone                        | 1140861970 | lipostat 10mg tablet        |
| 1140860758                               | capoten 12.5mg tablet (captopril)                           | 1141151016                       | losartan                                              | 1140874936    | deltacortril enteric 2.5mg e/c tablet | 1140888648 | pravastatin                 |
| 1140860764                               | capoten 12.5mg tablet (captopril)                           | 1141151018                       | potassium+hydrochlorothiazide<br>50mg/12.5mg tablet   | 1140874940    | deltastab 1mg tablet                  | 1140910654 | velastatin                  |
| 1140860776                               | innovace 2.5mg tablet (enalapril)                           | 1141152998                       | cozaar-comp 50mg/12.5mg tablet<br>(losartan)          | 1140874944    | precortisyl 1mg tablet                | 1140910632 | eptastatin                  |
| 1140860784                               | innozide tablet (enalapril + HCTZ)                          | 1141153006                       | irbesartan                                            | 1140874950    | prednesol 5mg tablet                  | 1141146234 | atorvastatin                |
| 1140860790                               | enalapril maleate+hydrochlorothiazide<br>20mg/12.5mg tablet | 1141156836                       | aprovel 75mg tablet (irbesartan)                      | 1140874954    | hydrocortistab 20mg tablet            | 1141146138 | lipitor 10mg tablet         |
| 1140860802                               | coversyl 2mg tablet (perindopril)                           | 1141156846                       | candesartan cilexetil                                 | 1140874956    | hydrocortone 10mg tablet              | 1140864592 | lescol 20mg capsule         |
| 1140860806                               | ramipril                                                    | 1141166006                       | amias 2mg tablet                                      | 1140874976    | methyprednisolone                     | 1141192414 | crestor 10mg tablet         |
| 1140860736                               | accuretic tablet (quinapril + HCTZ)                         | 1141171336                       | telmisartan                                           | 1140874978    | medrone 2mg tablet                    | 1141200040 | zocor heart-pro 10mg tablet |
| 1140860738                               | quinalapril+hydrochlorothiazide<br>10mg/12.5mg tablet       | 1141171344                       | eprosartan                                            | 1141157402    | prednisolone product                  | 1140881748 | zocor 10mg tablet           |
| 1140860878                               | staril 10mg tablet (fosinopril)                             | 1141172682                       | teveten 300mg tablet (eprosartan)                     | 1140910634    | deltahydrocortisone                   |            |                             |
| 1140860882                               | cilazapril                                                  | 1141172686                       | irbesartan+hydrochlorothiazide<br>150mg/12.5mg tablet | 1141145782    | deflazacort                           |            |                             |
| 1140860892                               | vascace 250micrograms tablet<br>(cilazapril)                | 1141187788                       | coaprovel 150mg/12.5mg tablet                         | 1140874790    | betamethasone                         |            |                             |
| 1140860904                               | trandolapril                                                | 1141193282                       | telmisartan+hydrochlorothiazide<br>40mg/12.5mg tablet | 1140874816    | dexamethasone                         |            |                             |
| 1140860912                               | gopten 500micrograms capsule<br>(trandolapril)              | 1141201038                       | olmesartan                                            |               |                                       |            |                             |
| 1140860918                               | odrik 500micrograms capsule<br>(trandolapril)               | 1141201040                       | valsartan+hydrochlorothiazide<br>80mg/12.5mg tablet   |               |                                       |            |                             |
| 1140860938                               | deponit 5mg/24hours transdermal<br>patch                    |                                  | co-diovan 80mg/12.5mg tablet<br>(valsartan + HCTZ)    |               |                                       |            |                             |
| 1140864952                               | lisinopril+hydrochlorothiazide<br>10mg/12.5mg tablet        |                                  |                                                       |               |                                       |            |                             |
| 1140888552                               | enalapril                                                   |                                  |                                                       |               |                                       |            |                             |
| 1140888556                               | fosinopril                                                  |                                  |                                                       |               |                                       |            |                             |
| 1140888560                               | perindopril                                                 |                                  |                                                       |               |                                       |            |                             |
| 1140923712                               | moexipril                                                   |                                  |                                                       |               |                                       |            |                             |
| 1141151382                               | hypapril 12.5mg tablet (captopril)                          |                                  |                                                       |               |                                       |            |                             |
| 1141153328                               | trandolapril+verapamil hydrochloride                        |                                  |                                                       |               |                                       |            |                             |
| 1141164148                               | imidapril hydrochloride                                     |                                  |                                                       |               |                                       |            |                             |
| 1141165470                               | felodipine+ramipril                                         |                                  |                                                       |               |                                       |            |                             |
| 1141167822                               | tensopril 12.5mg tablet (captopril)                         |                                  |                                                       |               |                                       |            |                             |
| 1141180592                               | perindopril+indapamide                                      |                                  |                                                       |               |                                       |            |                             |
| 1140860696                               | lisinopril                                                  |                                  |                                                       |               |                                       |            |                             |
| 1140860706                               | carace 2.5mg tablet (lisinopril + HCTZ)                     |                                  |                                                       |               |                                       |            |                             |
| 1140860714                               | zestril 2.5mg tablet (lisinopril)                           |                                  |                                                       |               |                                       |            |                             |



**Supplementary Table 2.** Results from univariate logistic models for risk of COVID-19 and non-COVID-19 death in the full UK Biobank sample. Effect size estimates are expressed as odds ratios [95% confidence intervals] with p-values.

|                            |                                       | COVID-19 deaths            |                        | Non-COVID-19 deaths    |                         |                         |
|----------------------------|---------------------------------------|----------------------------|------------------------|------------------------|-------------------------|-------------------------|
|                            |                                       | OR                         | p-value                | OR                     | p-value                 |                         |
| <b>Demographics</b>        | Age (years)                           |                            | 3.00 [2.63-3.43]       | 7.24x10 <sup>-60</sup> | 2.55 [2.42-2.68]        | 1.98x10 <sup>-275</sup> |
|                            | Sex (ref. Women)                      | <i>Men</i>                 | 2.15 [1.78-2.60]       | 3.25x10 <sup>-15</sup> | 1.57 [1.45-1.70]        | 2.00x10 <sup>-30</sup>  |
|                            | Ethnicity (ref. White)                | <i>Black</i>               | 3.17 [2.08-4.82]       | 7.69x10 <sup>-8</sup>  | 0.61 [0.42-0.89]        | 1.08x10 <sup>-2</sup>   |
|                            |                                       | <i>Other</i>               | 0.94 [0.57-1.55]       | 8.00x10 <sup>-1</sup>  | 0.56 [0.43-0.72]        | 1.14x10 <sup>-5</sup>   |
| <b>Social</b>              | Education (ref. High)                 | <i>Intermediate</i>        | 1.43 [1.11-1.85]       | 5.41x10 <sup>-3</sup>  | 1.22 [1.10-1.34]        | 7.42x10 <sup>-5</sup>   |
|                            |                                       | <i>Low</i>                 | 3.79 [2.92-4.91]       | 1.37x10 <sup>-23</sup> | 2.48 [2.23-2.76]        | 3.51x10 <sup>-64</sup>  |
|                            |                                       | <i>Flat</i>                | 1.91 [1.49-2.44]       | 2.93x10 <sup>-7</sup>  | 1.40 [1.25-1.57]        | 9.55x10 <sup>-9</sup>   |
|                            | Type of accommodation (ref. House)    | <i>Own with a mortgage</i> | 0.48 [0.38-0.61]       | 1.62x10 <sup>-9</sup>  | 0.41 [0.37-0.46]        | 2.31x10 <sup>-67</sup>  |
|                            | Own/Rent (ref. Own outright)          | <i>Rent</i>                | 1.98 [1.56-2.52]       | 2.13x10 <sup>-8</sup>  | 1.29 [1.15-1.44]        | 8.56x10 <sup>-6</sup>   |
|                            |                                       | Number in household        |                        | 0.63 [0.56-0.72]       | 4.29x10 <sup>-12</sup>  | 0.63 [0.60-0.66]        |
|                            | Income (GBP) (ref. 18,000 to 30,999)  | <i>Less than 18,000</i>    | 2.14 [1.66-2.76]       | 3.61x10 <sup>-9</sup>  | 1.54 [1.39-1.71]        | 2.36x10 <sup>-16</sup>  |
|                            |                                       | <i>31,000 to 51,999</i>    | 0.63 [0.46-0.87]       | 5.47x10 <sup>-3</sup>  | 0.57 [0.50-0.65]        | 3.85x10 <sup>-18</sup>  |
|                            |                                       | <i>Greater than 52,000</i> | 0.40 [0.27-0.58]       | 1.46x10 <sup>-6</sup>  | 0.43 [0.37-0.49]        | 7.73x10 <sup>-33</sup>  |
|                            | Occupation (ref. Employed (Other))    | <i>Healthcare worker</i>   | 1.66 [1.03-2.68]       | 3.81x10 <sup>-2</sup>  | 1.02 [0.81-1.28]        | 8.60x10 <sup>-1</sup>   |
| <i>Unemployed</i>          |                                       | 2.82 [2.10-3.79]           | 5.61x10 <sup>-12</sup> | 2.24 [1.98-2.53]       | 7.64x10 <sup>-39</sup>  |                         |
| <i>Retired</i>             |                                       | 4.31 [3.43-5.43]           | 1.12x10 <sup>-35</sup> | 3.48 [3.18-3.81]       | 2.26x10 <sup>-158</sup> |                         |
| <b>Health Risk Factors</b> | Smoking status (ref. Never)           | <i>Former</i>              | 2.02 [1.65-2.47]       | 8.69x10 <sup>-12</sup> | 1.55 [1.42-1.69]        | 3.18x10 <sup>-24</sup>  |
|                            |                                       | <i>Current</i>             | 2.32 [1.76-3.06]       | 2.50x10 <sup>-9</sup>  | 2.21 [1.98-2.47]        | 6.95x10 <sup>-45</sup>  |
|                            | Alcohol drinker status (ref. Current) | <i>Former</i>              | 2.39 [1.68-3.39]       | 1.16x10 <sup>-6</sup>  | 1.62 [1.36-1.93]        | 4.06x10 <sup>-8</sup>   |
|                            |                                       | <i>Never</i>               | 1.89 [1.34-2.67]       | 3.22x10 <sup>-4</sup>  | 1.51 [1.29-1.77]        | 2.26x10 <sup>-7</sup>   |
|                            | BMI (kg/m <sup>2</sup> ) (ref. <25)   | <i>[25,30[</i>             | 1.66 [1.29-2.14]       | 9.30x10 <sup>-5</sup>  | 1.15 [1.04-1.26]        | 4.68x10 <sup>-3</sup>   |
|                            |                                       | <i>[30,40[</i>             | 2.55 [1.96-3.32]       | 3.52x10 <sup>-12</sup> | 1.53 [1.38-1.69]        | 8.62x10 <sup>-16</sup>  |
|                            | <i>&gt;=40</i>                        | 4.92 [3.13-7.73]           | 4.73x10 <sup>-12</sup> | 2.02 [1.60-2.54]       | 2.34x10 <sup>-9</sup>   |                         |
| <b>Biological</b>          | Cholesterol (mmol/L)                  |                            | 0.79 [0.71-0.87]       | 2.43x10 <sup>-6</sup>  | 0.82 [0.78-0.85]        | 1.34x10 <sup>-22</sup>  |
|                            | HDL cholesterol (mmol/L)              |                            | 0.70 [0.63-0.79]       | 8.36x10 <sup>-10</sup> | 0.84 [0.80-0.88]        | 5.76x10 <sup>-15</sup>  |
|                            | Triglycerides (mmol/L)                |                            | 1.16 [1.07-1.26]       | 2.71x10 <sup>-4</sup>  | 1.10 [1.06-1.14]        | 3.93x10 <sup>-7</sup>   |
|                            | Vitamin D (nmol/L)                    |                            | 0.87 [0.79-0.97]       | 9.25x10 <sup>-3</sup>  | 0.94 [0.90-0.98]        | 3.57x10 <sup>-3</sup>   |
|                            | Cystatin C (mg/L)                     |                            | 1.19 [1.16-1.22]       | 1.18x10 <sup>-39</sup> | 1.25 [1.23-1.28]        | 2.01x10 <sup>-111</sup> |
| <b>Medical</b>             | Cancer (ref. No)                      | <i>Yes</i>                 | 1.73 [1.40-2.15]       | 5.73x10 <sup>-7</sup>  | 2.56 [2.36-2.78]        | 2.75x10 <sup>-109</sup> |
|                            | Cardiovascular (ref. No)              | <i>Yes</i>                 | 3.81 [3.17-4.58]       | 2.24x10 <sup>-46</sup> | 3.22 [2.98-3.48]        | 4.61x10 <sup>-192</sup> |
|                            | Hypertension (ref. No)                | <i>Yes</i>                 | 3.45 [2.86-4.16]       | 5.15x10 <sup>-38</sup> | 2.46 [2.28-2.66]        | 1.78x10 <sup>-116</sup> |
|                            | Diabetes (ref. No)                    | <i>Yes</i>                 | 4.41 [3.57-5.45]       | 7.56x10 <sup>-43</sup> | 2.91 [2.63-3.22]        | 1.31x10 <sup>-96</sup>  |
|                            | Respiratory (ref. No)                 | <i>Yes</i>                 | 1.89 [1.55-2.29]       | 1.78x10 <sup>-10</sup> | 1.91 [1.76-2.07]        | 4.80x10 <sup>-54</sup>  |
|                            | Autoimmune (ref. No)                  | <i>Yes</i>                 | 1.85 [1.48-2.30]       | 4.44x10 <sup>-8</sup>  | 1.65 [1.50-1.82]        | 5.98x10 <sup>-25</sup>  |
|                            | ACE inhibitors                        | <i>Yes</i>                 | 2.96 [2.38-3.68]       | 1.17x10 <sup>-22</sup> | 2.38 [2.16-2.63]        | 8.33x10 <sup>-69</sup>  |
|                            | Angiotensin II receptor blocker       | <i>Yes</i>                 | 2.41 [1.74-3.35]       | 1.51x10 <sup>-7</sup>  | 2.36 [2.06-2.71]        | 9.75x10 <sup>-34</sup>  |
|                            | Oral steroid                          | <i>Yes</i>                 | 4.24 [2.61-6.89]       | 5.42x10 <sup>-9</sup>  | 2.36 [1.80-3.09]        | 3.95x10 <sup>-10</sup>  |
|                            | Statin                                | <i>Yes</i>                 | 2.88 [2.38-3.50]       | 5.58x10 <sup>-27</sup> | 2.47 [2.27-2.68]        | 3.65x10 <sup>-100</sup> |
| <b>Environmental</b>       | NO <sub>x</sub> (ug/m <sup>3</sup> )  |                            | 1.15 [1.07-1.24]       | 2.98x10 <sup>-4</sup>  | 1.07 [1.03-1.10]        | 4.74x10 <sup>-4</sup>   |
|                            | PM10 (ug/m <sup>3</sup> )             |                            | 1.14 [1.04-1.26]       | 4.77x10 <sup>-3</sup>  | 1.03 [0.99-1.08]        | 1.16x10 <sup>-1</sup>   |
|                            | PM2.5 (absorbance/m)                  |                            | 1.14 [1.04-1.24]       | 4.29x10 <sup>-3</sup>  | 1.00 [0.96-1.04]        | 8.42x10 <sup>-1</sup>   |
|                            | PM2.5 (ug/m <sup>3</sup> )            |                            | 1.22 [1.11-1.33]       | 1.43x10 <sup>-5</sup>  | 1.07 [1.03-1.11]        | 7.76x10 <sup>-4</sup>   |

**Supplementary Table 3:** Characteristics of the (N=459) COVID-19 deaths in the UK Biobank study. Results are presented for both COVID-19 ICD codes: U07.1 – COVID-19 death with virus identified, and U07.2 probable COVID-19 death (without identification of the virus).

|                            | U071 (N=438)                         |                              |                        | U072 (N=21) |                        |         |
|----------------------------|--------------------------------------|------------------------------|------------------------|-------------|------------------------|---------|
|                            |                                      | N                            | Mean (sd) / Proportion | N           | Mean (sd) / Proportion |         |
| <b>Demographics</b>        | Age (years)                          | 438                          | 74.42 (5.97)           | 21          | 76.19 (5.48)           |         |
|                            | Sex                                  | Women                        | 160                    | 36.53%      | 8                      | 38.10%  |
|                            |                                      | Men                          | 278                    | 63.47%      | 13                     | 61.90%  |
|                            | Ethnicity                            | White                        | 394                    | 90.99%      | 21                     | 100.00% |
|                            |                                      | Black                        | 23                     | 5.31%       | 0                      | 0.00%   |
|                            |                                      | Other                        | 16                     | 3.70%       | 0                      | 0.00%   |
| Education                  |                                      |                              |                        |             |                        |         |
|                            | High                                 | 81                           | 19.42%                 | 6           | 30.00%                 |         |
|                            | Intermediate                         | 182                          | 43.65%                 | 6           | 30.00%                 |         |
|                            | Low                                  | 154                          | 36.93%                 | 8           | 40.00%                 |         |
| <b>Social</b>              | Type of accommodation                | House                        | 351                    | 82.78%      | 18                     | 85.71%  |
|                            |                                      | Flat                         | 73                     | 17.22%      | 3                      | 14.29%  |
|                            | Own or rent accommodation            | Own outright                 | 245                    | 58.33%      | 13                     | 65.00%  |
|                            |                                      | Own with a mortgage          | 89                     | 21.19%      | 2                      | 10.00%  |
|                            |                                      | Rent                         | 86                     | 20.48%      | 5                      | 25.00%  |
|                            | Number in household                  | 423                          | 2.06 (1.04)            | 20          | 2.10 (0.97)            |         |
|                            | Average household income (GBP)       | Less than 18,000             | 161                    | 46.53%      | 10                     | 52.63%  |
|                            |                                      | 18,000 to 30,999             | 89                     | 25.72%      | 4                      | 21.05%  |
|                            |                                      | 31,000 to 51,999             | 58                     | 16.76%      | 4                      | 21.05%  |
|                            |                                      | Greater than 52,000          | 38                     | 10.98%      | 1                      | 5.26%   |
|                            | Occupation                           | Unemployed                   | 75                     | 17.32%      | 3                      | 14.29%  |
|                            |                                      | Employed (Healthcare worker) | 20                     | 4.62%       | 0                      | 0.00%   |
|                            |                                      | Employed (Other)             | 99                     | 22.86%      | 3                      | 14.29%  |
| Retired                    |                                      | 239                          | 55.20%                 | 15          | 71.43%                 |         |
| <b>Health Risk Factors</b> | Smoking status                       | Never                        | 166                    | 38.43%      | 5                      | 23.81%  |
|                            |                                      | Former                       | 201                    | 46.53%      | 10                     | 47.62%  |
|                            |                                      | Current                      | 65                     | 15.05%      | 6                      | 28.57%  |
|                            | Alcohol drinker status               | Never                        | 34                     | 7.83%       | 1                      | 4.76%   |
|                            |                                      | Former                       | 32                     | 7.37%       | 2                      | 9.52%   |
|                            |                                      | Current                      | 368                    | 84.79%      | 18                     | 85.71%  |
|                            | Body Mass Index (kg/m <sup>2</sup> ) | <25                          | 79                     | 18.54%      | 9                      | 42.86%  |
|                            |                                      | [25,30[                      | 177                    | 41.55%      | 9                      | 42.86%  |
|                            |                                      | [30,40[                      | 146                    | 34.27%      | 3                      | 14.29%  |
| >=40                       |                                      | 24                           | 5.63%                  | 0           | 0.00%                  |         |
| <b>Biological</b>          | Cholesterol (mmol/L)                 | 403                          | 5.46 (1.26)            | 18          | 5.10 (1.24)            |         |
|                            | HDL cholesterol (mmol/L)             | 375                          | 1.34 (0.36)            | 17          | 1.32 (0.43)            |         |
|                            | Triglycerides (mmol/L)               | 403                          | 1.90 (1.08)            | 18          | 2.29 (1.02)            |         |
|                            | Vitamin D (nmol/L)                   | 380                          | 46.10 (21.54)          | 18          | 44.53 (19.68)          |         |
|                            | Cystatin C (mg/L)                    | 403                          | 1.02 (0.22)            | 18          | 0.94 (0.20)            |         |
| <b>Medical</b>             | Cancer                               | No                           | 335                    | 76.48%      | 16                     | 76.19%  |
|                            |                                      | Yes                          | 103                    | 23.52%      | 5                      | 23.81%  |
|                            | Cardiovascular                       | No                           | 232                    | 52.97%      | 11                     | 52.38%  |
|                            |                                      | Yes                          | 206                    | 47.03%      | 10                     | 47.62%  |
|                            | Hypertension                         | No                           | 166                    | 37.90%      | 10                     | 47.62%  |
|                            |                                      | Yes                          | 272                    | 62.10%      | 11                     | 52.38%  |
|                            | Diabetes                             | No                           | 330                    | 75.34%      | 15                     | 71.43%  |
|                            |                                      | Yes                          | 108                    | 24.66%      | 6                      | 28.57%  |
|                            | Respiratory                          | No                           | 297                    | 67.81%      | 12                     | 57.14%  |
|                            |                                      | Yes                          | 141                    | 32.19%      | 9                      | 42.86%  |
|                            | Autoimmune                           | No                           | 341                    | 77.85%      | 16                     | 76.19%  |
|                            |                                      | Yes                          | 97                     | 22.15%      | 5                      | 23.81%  |
|                            | ACE inhibitors                       | No                           | 334                    | 76.26%      | 19                     | 90.48%  |
|                            |                                      | Yes                          | 104                    | 23.74%      | 2                      | 9.52%   |
|                            | Angiotensin II receptor blocker      | No                           | 402                    | 91.78%      | 18                     | 85.71%  |
|                            |                                      | Yes                          | 36                     | 8.22%       | 3                      | 14.29%  |
|                            | Oral steroid                         | No                           | 421                    | 96.12%      | 21                     | 100.00% |
|                            |                                      | Yes                          | 17                     | 3.88%       | 0                      | 0.00%   |
|                            | Statin                               | No                           | 290                    | 66.21%      | 12                     | 57.14%  |
|                            |                                      | Yes                          | 148                    | 33.79%      | 9                      | 42.86%  |
| <b>Enviro</b>              | NO <sub>x</sub> (ug/m <sup>3</sup> ) | 426                          | 46.72 (15.42)          | 20          | 45.14 (14.64)          |         |
|                            | PM10 (ug/m <sup>3</sup> )            | 390                          | 16.52 (1.76)           | 13          | 15.85 (2.07)           |         |
|                            | PM2.5 (absorbance/m)                 | 390                          | 1.23 (0.26)            | 13          | 1.21 (0.20)            |         |
|                            | PM2.5 (ug/m <sup>3</sup> )           | 390                          | 10.22 (1.01)           | 13          | 10.04 (1.24)           |         |

**Supplementary Table 4.** Odds ratio [95% confidence intervals], and p-values from logistic models for the probability of COVID-19 death (A) and non-COVID-19 death (B) in the full UK Biobank sample. Results are represented for sequentially adjusted models, where benchmark predictors are defined as demographic descriptors (D, Model 1), and models are additionally adjusted for social (S, Model 2), health risk (HRF, Model 3), biological (B, Model 4), medical (M, Model 5), and environmental factors (E, Model 6).

|   |                            | Model 1                    |                        | Model 2                |                        | Model 3                |                        | Model 4               |                        | Model 5               |                        | Model 6               |                        |                       |
|---|----------------------------|----------------------------|------------------------|------------------------|------------------------|------------------------|------------------------|-----------------------|------------------------|-----------------------|------------------------|-----------------------|------------------------|-----------------------|
|   |                            | OR                         | p-value                | OR                     | p-value                | OR                     | p-value                | OR                    | p-value                | OR                    | p-value                | OR                    | p-value                |                       |
| D | Age (years)                | 3.20 [2.68-3.84]           | 9.78x10 <sup>-37</sup> | 3.12 [2.49-3.90]       | 3.53x10 <sup>-23</sup> | 3.18 [2.53-3.99]       | 2.39x10 <sup>-23</sup> | 3.09 [2.46-3.89]      | 4.63x10 <sup>-22</sup> | 2.75 [2.18-3.48]      | 2.75x10 <sup>-17</sup> | 2.76 [2.18-3.49]      | 2.61x10 <sup>-17</sup> |                       |
|   | Sex (ref. Women)           | <i>Men</i>                 | 1.49 [1.30-1.71]       | 6.63x10 <sup>-9</sup>  | 1.56 [1.36-1.80]       | 2.67x10 <sup>-10</sup> | 1.54 [1.33-1.77]       | 3.05x10 <sup>-9</sup> | 1.46 [1.25-1.70]       | 2.09x10 <sup>-6</sup> | 1.47 [1.26-1.72]       | 1.43x10 <sup>-6</sup> | 1.47 [1.26-1.73]       | 1.30x10 <sup>-6</sup> |
|   | Ethnicity (ref. White)     | <i>Black</i>               | 1.30 [1.22-1.38]       | 1.82x10 <sup>-15</sup> | 1.22 [1.14-1.31]       | 6.20x10 <sup>-9</sup>  | 1.22 [1.14-1.31]       | 8.67x10 <sup>-9</sup> | 1.22 [1.14-1.31]       | 1.45x10 <sup>-8</sup> | 1.21 [1.13-1.30]       | 8.90x10 <sup>-8</sup> | 1.21 [1.12-1.29]       | 3.00x10 <sup>-7</sup> |
|   |                            | <i>Other</i>               | 1.03 [0.90-1.19]       | 6.46x10 <sup>-1</sup>  | 1.01 [0.87-1.17]       | 8.82x10 <sup>-1</sup>  | 1.00 [0.87-1.16]       | 9.75x10 <sup>-1</sup> | 0.98 [0.85-1.14]       | 8.25x10 <sup>-1</sup> | 0.97 [0.83-1.12]       | 6.46x10 <sup>-1</sup> | 0.96 [0.83-1.11]       | 5.82x10 <sup>-1</sup> |
|   | Education                  | <i>Intermediate</i>        |                        | 1.11 [0.94-1.30]       | 2.34x10 <sup>-1</sup>  | 1.07 [0.91-1.26]       | 4.22x10 <sup>-1</sup>  | 1.07 [0.91-1.27]      | 4.03x10 <sup>-1</sup>  | 1.06 [0.89-1.25]      | 5.22x10 <sup>-1</sup>  | 1.06 [0.90-1.25]      | 5.10x10 <sup>-1</sup>  |                       |
|   | (ref. High)                | <i>Low</i>                 |                        | 1.17 [1.02-1.34]       | 2.13x10 <sup>-2</sup>  | 1.12 [0.98-1.29]       | 8.69x10 <sup>-2</sup>  | 1.13 [0.98-1.29]      | 8.70x10 <sup>-2</sup>  | 1.11 [0.97-1.27]      | 1.35x10 <sup>-1</sup>  | 1.11 [0.97-1.27]      | 1.34x10 <sup>-1</sup>  |                       |
|   | Accomm. (ref. House)       | <i>Flat</i>                |                        | 1.11 [0.99-1.24]       | 8.07x10 <sup>-2</sup>  | 1.10 [0.98-1.23]       | 9.83x10 <sup>-2</sup>  | 1.10 [0.98-1.23]      | 1.03x10 <sup>-1</sup>  | 1.10 [0.98-1.23]      | 9.85x10 <sup>-2</sup>  | 1.09 [0.97-1.22]      | 1.68x10 <sup>-1</sup>  |                       |
|   | Own                        | <i>Own with a mortgage</i> |                        | 1.13 [0.95-1.33]       | 1.73x10 <sup>-1</sup>  | 1.09 [0.92-1.29]       | 3.16x10 <sup>-1</sup>  | 1.08 [0.91-1.28]      | 3.67x10 <sup>-1</sup>  | 1.06 [0.90-1.26]      | 4.86x10 <sup>-1</sup>  | 1.06 [0.90-1.26]      | 4.81x10 <sup>-1</sup>  |                       |
|   | (ref. Own outright)        | <i>Rent</i>                |                        | 1.18 [1.05-1.33]       | 5.74x10 <sup>-3</sup>  | 1.12 [0.99-1.26]       | 7.35x10 <sup>-2</sup>  | 1.10 [0.98-1.24]      | 1.15x10 <sup>-1</sup>  | 1.08 [0.95-1.21]      | 2.29x10 <sup>-1</sup>  | 1.08 [0.95-1.21]      | 2.27x10 <sup>-1</sup>  |                       |
| S | Number in household        |                            | 1.00 [0.86-1.16]       | 9.62x10 <sup>-1</sup>  | 1.01 [0.87-1.17]       | 9.37x10 <sup>-1</sup>  | 1.01 [0.87-1.17]       | 9.44x10 <sup>-1</sup> | 1.01 [0.87-1.16]       | 9.41x10 <sup>-1</sup> | 1.00 [0.86-1.16]       | 9.41x10 <sup>-1</sup> | 9.66x10 <sup>-1</sup>  |                       |
|   | Income (GBP)               | <i>&lt;18,000</i>          |                        | 1.16 [1.01-1.33]       | 3.95x10 <sup>-2</sup>  | 1.13 [0.98-1.30]       | 8.47x10 <sup>-2</sup>  | 1.12 [0.97-1.29]      | 1.19x10 <sup>-1</sup>  | 1.10 [0.96-1.27]      | 1.73x10 <sup>-1</sup>  | 1.10 [0.96-1.27]      | 1.78x10 <sup>-1</sup>  |                       |
|   | (ref. 18,000 to 30,999)    | <i>31,000-51,999</i>       |                        | 1.07 [0.90-1.27]       | 4.47x10 <sup>-1</sup>  | 1.08 [0.91-1.28]       | 3.86x10 <sup>-1</sup>  | 1.09 [0.91-1.29]      | 3.48x10 <sup>-1</sup>  | 1.09 [0.92-1.30]      | 3.23x10 <sup>-1</sup>  | 1.09 [0.92-1.30]      | 3.13x10 <sup>-1</sup>  |                       |
|   |                            | <i>&gt;52,000</i>          |                        | 1.05 [0.86-1.29]       | 6.40x10 <sup>-1</sup>  | 1.08 [0.88-1.32]       | 4.73x10 <sup>-1</sup>  | 1.09 [0.89-1.34]      | 4.11x10 <sup>-1</sup>  | 1.11 [0.90-1.36]      | 3.38x10 <sup>-1</sup>  | 1.11 [0.90-1.36]      | 3.29x10 <sup>-1</sup>  |                       |
|   | Occup.                     | <i>Healthcare worker</i>   |                        | 1.30 [1.14-1.49]       | 1.53x10 <sup>-4</sup>  | 1.29 [1.13-1.49]       | 2.26x10 <sup>-4</sup>  | 1.29 [1.13-1.48]      | 2.39x10 <sup>-4</sup>  | 1.29 [1.12-1.48]      | 3.02x10 <sup>-4</sup>  | 1.29 [1.12-1.48]      | 2.88x10 <sup>-4</sup>  |                       |
|   | (ref. Employed)            | <i>Unemployed</i>          |                        | 1.18 [1.02-1.36]       | 2.76x10 <sup>-2</sup>  | 1.15 [0.99-1.33]       | 6.39x10 <sup>-2</sup>  | 1.15 [0.99-1.33]      | 6.98x10 <sup>-2</sup>  | 1.10 [0.95-1.27]      | 2.14x10 <sup>-1</sup>  | 1.10 [0.95-1.28]      | 2.05x10 <sup>-1</sup>  |                       |
|   | (Other)                    | <i>Retired</i>             |                        | 1.11 [0.94-1.31]       | 2.11x10 <sup>-1</sup>  | 1.11 [0.94-1.31]       | 2.07x10 <sup>-1</sup>  | 1.12 [0.95-1.32]      | 1.81x10 <sup>-1</sup>  | 1.10 [0.93-1.30]      | 2.59x10 <sup>-1</sup>  | 1.10 [0.93-1.30]      | 2.43x10 <sup>-1</sup>  |                       |
|   | Smoking status             | <i>Former</i>              |                        |                        |                        | 1.15 [1.00-1.31]       | 4.58x10 <sup>-2</sup>  | 1.15 [1.00-1.31]      | 4.55x10 <sup>-2</sup>  | 1.11 [0.97-1.27]      | 1.24x10 <sup>-1</sup>  | 1.11 [0.97-1.27]      | 1.29x10 <sup>-1</sup>  |                       |
|   | (ref. Never)               | <i>Current</i>             |                        | 1.25 [1.11-1.40]       | 1.63x10 <sup>-4</sup>  | 1.22 [1.09-1.38]       | 7.22x10 <sup>-4</sup>  | 1.22 [1.09-1.38]      | 7.22x10 <sup>-4</sup>  | 1.21 [1.08-1.37]      | 1.26x10 <sup>-3</sup>  | 1.21 [1.08-1.36]      | 1.37x10 <sup>-3</sup>  |                       |
| H | Alcohol drinker status     | <i>Former</i>              |                        |                        |                        | 1.14 [1.06-1.24]       | 1.10x10 <sup>-3</sup>  | 1.13 [1.04-1.23]      | 3.48x10 <sup>-3</sup>  | 1.11 [1.02-1.20]      | 1.38x10 <sup>-2</sup>  | 1.11 [1.02-1.20]      | 1.32x10 <sup>-2</sup>  |                       |
| R | (ref. Current)             | <i>Never</i>               |                        |                        |                        | 1.10 [0.99-1.22]       | 7.29x10 <sup>-2</sup>  | 1.08 [0.98-1.20]      | 1.25x10 <sup>-1</sup>  | 1.07 [0.97-1.19]      | 1.69x10 <sup>-1</sup>  | 1.07 [0.97-1.19]      | 1.68x10 <sup>-1</sup>  |                       |
| F | BMI (kg/m <sup>2</sup> )   | <i>[25,30[</i>             |                        |                        |                        | 1.09 [0.93-1.29]       | 2.94x10 <sup>-1</sup>  | 1.05 [0.89-1.25]      | 5.60x10 <sup>-1</sup>  | 1.01 [0.85-1.20]      | 8.90x10 <sup>-1</sup>  | 1.01 [0.85-1.20]      | 8.99x10 <sup>-1</sup>  |                       |
|   | (ref. <25)                 | <i>[30,40[</i>             |                        |                        |                        | 1.24 [1.06-1.43]       | 5.29x10 <sup>-3</sup>  | 1.15 [0.98-1.35]      | 8.24x10 <sup>-2</sup>  | 1.04 [0.89-1.23]      | 6.06x10 <sup>-1</sup>  | 1.04 [0.89-1.23]      | 6.14x10 <sup>-1</sup>  |                       |
|   |                            | <i>&gt;=40</i>             |                        |                        |                        | 1.18 [1.08-1.29]       | 2.51x10 <sup>-4</sup>  | 1.13 [1.04-1.24]      | 6.82x10 <sup>-3</sup>  | 1.07 [0.97-1.17]      | 1.59x10 <sup>-1</sup>  | 1.07 [0.97-1.17]      | 1.61x10 <sup>-1</sup>  |                       |
| B | Cholesterol (mmol/L)       |                            |                        |                        |                        |                        |                        | 0.98 [0.84-1.14]      | 7.84x10 <sup>-1</sup>  | 1.11 [0.92-1.33]      | 2.84x10 <sup>-1</sup>  | 1.11 [0.92-1.33]      | 2.80x10 <sup>-1</sup>  |                       |
|   | HDL cholesterol (mmol/L)   |                            |                        |                        |                        |                        |                        | 0.92 [0.76-1.11]      | 3.96x10 <sup>-1</sup>  | 0.91 [0.75-1.10]      | 3.19x10 <sup>-1</sup>  | 0.91 [0.75-1.10]      | 3.14x10 <sup>-1</sup>  |                       |
|   | Triglycerides (mmol/L)     |                            |                        |                        |                        |                        |                        | 1.04 [0.90-1.20]      | 6.35x10 <sup>-1</sup>  | 0.99 [0.85-1.15]      | 8.74x10 <sup>-1</sup>  | 0.99 [0.85-1.15]      | 8.77x10 <sup>-1</sup>  |                       |
|   | Vitamin D (nmol/L)         |                            |                        |                        |                        |                        |                        | 0.89 [0.77-1.03]      | 1.09x10 <sup>-1</sup>  | 0.91 [0.79-1.05]      | 1.91x10 <sup>-1</sup>  | 0.91 [0.79-1.05]      | 2.00x10 <sup>-1</sup>  |                       |
|   | Cystatin C (mg/L)          |                            |                        |                        |                        |                        |                        | 1.10 [1.02-1.18]      | 8.32x10 <sup>-3</sup>  | 1.05 [0.97-1.14]      | 2.33x10 <sup>-1</sup>  | 1.05 [0.97-1.14]      | 2.39x10 <sup>-1</sup>  |                       |
| M | Cancer (ref. No)           | <i>Yes</i>                 |                        |                        |                        |                        |                        |                       |                        | 1.01 [0.91-1.12]      | 8.69x10 <sup>-1</sup>  | 1.01 [0.91-1.13]      | 8.68x10 <sup>-1</sup>  |                       |
|   | Cardiovascular (ref. No)   | <i>Yes</i>                 |                        |                        |                        |                        |                        |                       |                        | 1.22 [1.10-1.36]      | 2.66x10 <sup>-4</sup>  | 1.22 [1.10-1.36]      | 2.63x10 <sup>-4</sup>  |                       |
|   | Hypertension (ref. No)     | <i>Yes</i>                 |                        |                        |                        |                        |                        |                       |                        | 1.22 [1.06-1.41]      | 7.17x10 <sup>-3</sup>  | 1.22 [1.05-1.41]      | 7.34x10 <sup>-3</sup>  |                       |
|   | Diabetes (ref. No)         | <i>Yes</i>                 |                        |                        |                        |                        |                        |                       |                        | 1.16 [1.06-1.26]      | 8.08x10 <sup>-4</sup>  | 1.16 [1.06-1.26]      | 8.44x10 <sup>-4</sup>  |                       |
|   | Respiratory (ref. No)      | <i>Yes</i>                 |                        |                        |                        |                        |                        |                       |                        | 1.09 [0.97-1.22]      | 1.34x10 <sup>-1</sup>  | 1.09 [0.97-1.22]      | 1.37x10 <sup>-1</sup>  |                       |
|   | Autoimmune (ref. No)       | <i>Yes</i>                 |                        |                        |                        |                        |                        |                       |                        | 1.14 [1.03-1.27]      | 1.50x10 <sup>-2</sup>  | 1.14 [1.03-1.27]      | 1.48x10 <sup>-2</sup>  |                       |
|   | ACE inhibitors             | <i>Yes</i>                 |                        |                        |                        |                        |                        |                       |                        | 0.99 [0.90-1.10]      | 9.23x10 <sup>-1</sup>  | 1.00 [0.90-1.11]      | 9.35x10 <sup>-1</sup>  |                       |
|   | Angiotensin II RB          | <i>Yes</i>                 |                        |                        |                        |                        |                        |                       |                        | 1.03 [0.94-1.12]      | 5.68x10 <sup>-1</sup>  | 1.03 [0.94-1.12]      | 5.62x10 <sup>-1</sup>  |                       |
|   | Oral steroid               | <i>Yes</i>                 |                        |                        |                        |                        |                        |                       |                        | 1.09 [1.03-1.16]      | 4.26x10 <sup>-3</sup>  | 1.09 [1.03-1.16]      | 4.22x10 <sup>-3</sup>  |                       |
|   | Statin                     | <i>Yes</i>                 |                        |                        |                        |                        |                        |                       |                        | 0.93 [0.82-1.06]      | 2.89x10 <sup>-1</sup>  | 0.93 [0.82-1.06]      | 2.80x10 <sup>-1</sup>  |                       |
|   |                            | NOx (ug/m <sup>3</sup> )   |                        |                        |                        |                        |                        |                       |                        |                       |                        | 1.07 [0.86-1.33]      | 5.29x10 <sup>-1</sup>  |                       |
| E | PM10 (ug/m <sup>3</sup> )  |                            |                        |                        |                        |                        |                        |                       |                        |                       | 1.08 [0.92-1.26]       | 3.33x10 <sup>-1</sup> |                        |                       |
|   | PM2.5 (absorbance/m)       |                            |                        |                        |                        |                        |                        |                       |                        |                       | 1.01 [0.85-1.20]       | 9.27x10 <sup>-1</sup> |                        |                       |
|   | PM2.5 (ug/m <sup>3</sup> ) |                            |                        |                        |                        |                        |                        |                       |                        |                       | 0.94 [0.75-1.18]       | 5.90x10 <sup>-1</sup> |                        |                       |

A

**B**

|                                       |                                      | Model 1                    |                         | Model 2                |                        | Model 3                |                        | Model 4                |                        | Model 5                |                        | Model 6                |                        |                       |
|---------------------------------------|--------------------------------------|----------------------------|-------------------------|------------------------|------------------------|------------------------|------------------------|------------------------|------------------------|------------------------|------------------------|------------------------|------------------------|-----------------------|
|                                       |                                      | OR                         | p-value                 | OR                     | p-value                | OR                     | p-value                | OR                     | p-value                | OR                     | p-value                | OR                     | p-value                |                       |
| D                                     | Age (years)                          | 2.62 [2.45-2.81]           | 1.99x10 <sup>-163</sup> | 2.41 [2.20-2.64]       | 8.72x10 <sup>-83</sup> | 2.46 [2.25-2.69]       | 3.71x10 <sup>-85</sup> | 2.34 [2.14-2.56]       | 7.75x10 <sup>-76</sup> | 2.10 [1.92-2.31]       | 3.97x10 <sup>-56</sup> | 2.11 [1.92-2.31]       | 3.55x10 <sup>-56</sup> |                       |
|                                       | Sex (ref. Women)                     | <i>Men</i>                 | 1.61x10 <sup>-13</sup>  | 1.25 [1.19-1.32]       | 1.19x10 <sup>-16</sup> | 1.24 [1.17-1.31]       | 1.44x10 <sup>-14</sup> | 1.19 [1.12-1.26]       | 2.46x10 <sup>-8</sup>  | 1.19 [1.12-1.27]       | 2.43x10 <sup>-8</sup>  | 1.19 [1.12-1.27]       | 2.21x10 <sup>-8</sup>  |                       |
|                                       | Ethnicity (ref. White)               | <i>Black</i>               | 0.99 [0.92-1.06]        | 6.80x10 <sup>-1</sup>  | 0.95 [0.88-1.02]       | 1.68x10 <sup>-1</sup>  | 0.95 [0.88-1.02]       | 1.67x10 <sup>-1</sup>  | 0.94 [0.88-1.01]       | 1.04x10 <sup>-1</sup>  | 0.94 [0.88-1.01]       | 1.16x10 <sup>-1</sup>  | 0.95 [0.88-1.02]       | 1.34x10 <sup>-1</sup> |
|                                       |                                      | <i>Other</i>               | 0.91 [0.85-0.99]        | 2.51x10 <sup>-2</sup>  | 0.90 [0.83-0.97]       | 9.52x10 <sup>-3</sup>  | 0.89 [0.82-0.97]       | 4.56x10 <sup>-3</sup>  | 0.87 [0.80-0.94]       | 7.11x10 <sup>-4</sup>  | 0.87 [0.80-0.94]       | 7.46x10 <sup>-4</sup>  | 0.87 [0.81-0.95]       | 9.47x10 <sup>-4</sup> |
| S                                     | Education (ref. High)                | <i>Intermediate</i>        |                         | 1.02 [0.95-1.08]       | 6.30x10 <sup>-1</sup>  | 0.99 [0.93-1.06]       | 8.73x10 <sup>-1</sup>  | 1.00 [0.94-1.07]       | 9.64x10 <sup>-1</sup>  | 1.00 [0.93-1.06]       | 9.38x10 <sup>-1</sup>  | 1.00 [0.93-1.06]       | 8.97x10 <sup>-1</sup>  |                       |
|                                       | Accomm. (ref. House)                 | <i>Low</i>                 |                         | 1.06 [1.00-1.11]       | 5.29x10 <sup>-2</sup>  | 1.03 [0.97-1.09]       | 3.35x10 <sup>-1</sup>  | 1.03 [0.97-1.09]       | 3.39x10 <sup>-1</sup>  | 1.02 [0.96-1.08]       | 5.08x10 <sup>-1</sup>  | 1.02 [0.96-1.08]       | 5.39x10 <sup>-1</sup>  |                       |
|                                       |                                      | <i>Flat</i>                |                         | 1.04 [0.99-1.09]       | 1.53x10 <sup>-1</sup>  | 1.03 [0.98-1.09]       | 2.31x10 <sup>-1</sup>  | 1.03 [0.98-1.08]       | 3.16x10 <sup>-1</sup>  | 1.03 [0.98-1.08]       | 2.69x10 <sup>-1</sup>  | 1.03 [0.98-1.09]       | 2.39x10 <sup>-1</sup>  |                       |
|                                       | Own (ref. Own outright)              | <i>Own with a mortgage</i> |                         | 1.03 [0.96-1.11]       | 3.52x10 <sup>-1</sup>  | 1.01 [0.94-1.09]       | 7.40x10 <sup>-1</sup>  | 1.00 [0.94-1.08]       | 9.12x10 <sup>-1</sup>  | 0.99 [0.92-1.06]       | 7.85x10 <sup>-1</sup>  | 0.99 [0.92-1.06]       | 7.48x10 <sup>-1</sup>  |                       |
|                                       |                                      | <i>Rent</i>                |                         | 1.16 [1.10-1.22]       | 8.72x10 <sup>-9</sup>  | 1.11 [1.06-1.17]       | 5.56x10 <sup>-5</sup>  | 1.09 [1.04-1.15]       | 6.53x10 <sup>-4</sup>  | 1.07 [1.02-1.13]       | 9.26x10 <sup>-3</sup>  | 1.07 [1.02-1.13]       | 9.71x10 <sup>-3</sup>  |                       |
|                                       | Number in household                  |                            | 0.97 [0.90-1.05]        | 4.38x10 <sup>-1</sup>  | 0.98 [0.91-1.05]       | 5.44x10 <sup>-1</sup>  | 0.98 [0.91-1.05]       | 5.17x10 <sup>-1</sup>  | 0.98 [0.91-1.05]       | 4.99x10 <sup>-1</sup>  | 0.98 [0.91-1.05]       | 4.99x10 <sup>-1</sup>  | 0.98 [0.91-1.05]       | 5.04x10 <sup>-1</sup> |
|                                       | Income (GBP) (ref. 18,000 to 30,999) | <i>&lt;18,000</i>          |                         | 1.05 [0.99-1.11]       | 1.10x10 <sup>-1</sup>  | 1.03 [0.97-1.09]       | 3.03x10 <sup>-1</sup>  | 1.02 [0.96-1.07]       | 5.61x10 <sup>-1</sup>  | 1.01 [0.95-1.07]       | 7.82x10 <sup>-1</sup>  | 1.01 [0.95-1.06]       | 8.35x10 <sup>-1</sup>  |                       |
|                                       |                                      | <i>31,000-51,999</i>       |                         | 0.90 [0.84-0.97]       | 4.42x10 <sup>-3</sup>  | 0.91 [0.85-0.98]       | 9.65x10 <sup>-3</sup>  | 0.92 [0.86-0.99]       | 1.73x10 <sup>-2</sup>  | 0.92 [0.86-0.99]       | 2.18x10 <sup>-2</sup>  | 0.92 [0.86-0.99]       | 2.52x10 <sup>-2</sup>  |                       |
|                                       |                                      | <i>&gt;52,000</i>          |                         | 0.93 [0.85-1.00]       | 5.96x10 <sup>-2</sup>  | 0.95 [0.87-1.02]       | 1.67x10 <sup>-1</sup>  | 0.95 [0.88-1.03]       | 2.59x10 <sup>-1</sup>  | 0.96 [0.89-1.04]       | 3.43x10 <sup>-1</sup>  | 0.97 [0.89-1.05]       | 4.14x10 <sup>-1</sup>  |                       |
|                                       | Occup. (ref. Employed (Other))       | <i>Healthcare worker</i>   |                         | 1.05 [0.98-1.13]       | 1.52x10 <sup>-1</sup>  | 1.05 [0.98-1.13]       | 1.82x10 <sup>-1</sup>  | 1.04 [0.97-1.12]       | 2.38x10 <sup>-1</sup>  | 1.04 [0.96-1.11]       | 3.28x10 <sup>-1</sup>  | 1.04 [0.96-1.11]       | 3.32x10 <sup>-1</sup>  |                       |
| <i>Unemployed</i>                     |                                      |                            | 1.13 [1.06-1.19]        | 4.93x10 <sup>-5</sup>  | 1.11 [1.05-1.18]       | 2.83x10 <sup>-4</sup>  | 1.11 [1.04-1.17]       | 7.24x10 <sup>-4</sup>  | 1.08 [1.02-1.14]       | 1.05x10 <sup>-2</sup>  | 1.08 [1.02-1.14]       | 1.01x10 <sup>-2</sup>  |                        |                       |
| <i>Retired</i>                        |                                      |                            | 1.07 [1.00-1.14]        | 5.02x10 <sup>-2</sup>  | 1.07 [1.00-1.15]       | 3.68x10 <sup>-2</sup>  | 1.07 [1.01-1.15]       | 3.33x10 <sup>-2</sup>  | 1.06 [0.99-1.13]       | 8.52x10 <sup>-2</sup>  | 1.06 [0.99-1.13]       | 8.31x10 <sup>-2</sup>  |                        |                       |
| Smoking status (ref. Never)           | <i>Former</i>                        |                            | 1.09 [1.03-1.15]        | 2.63x10 <sup>-3</sup>  | 1.08 [1.03-1.15]       | 3.75x10 <sup>-3</sup>  | 1.06 [1.00-1.12]       | 4.37x10 <sup>-2</sup>  | 1.06 [1.00-1.12]       | 4.37x10 <sup>-2</sup>  | 1.06 [1.00-1.12]       | 4.35x10 <sup>-2</sup>  |                        |                       |
|                                       | <i>Current</i>                       |                            | 1.25 [1.20-1.31]        | 2.10x10 <sup>-21</sup> | 1.23 [1.17-1.29]       | 4.43x10 <sup>-18</sup> | 1.21 [1.16-1.27]       | 7.91x10 <sup>-16</sup> | 1.21 [1.16-1.27]       | 7.91x10 <sup>-16</sup> | 1.21 [1.16-1.27]       | 8.36x10 <sup>-16</sup> |                        |                       |
|                                       | <i>Former</i>                        |                            | 1.04 [0.99-1.08]        | 9.46x10 <sup>-2</sup>  | 1.02 [0.98-1.07]       | 2.97x10 <sup>-1</sup>  | 1.01 [0.97-1.06]       | 5.38x10 <sup>-1</sup>  | 1.01 [0.97-1.06]       | 5.38x10 <sup>-1</sup>  | 1.01 [0.97-1.06]       | 5.37x10 <sup>-1</sup>  |                        |                       |
| Alcohol drinker status (ref. Current) | <i>Former</i>                        |                            | 1.09 [1.04-1.14]        | 1.07x10 <sup>-4</sup>  | 1.08 [1.03-1.12]       | 9.35x10 <sup>-4</sup>  | 1.07 [1.02-1.12]       | 2.37x10 <sup>-3</sup>  | 1.07 [1.02-1.12]       | 2.37x10 <sup>-3</sup>  | 1.07 [1.02-1.12]       | 2.34x10 <sup>-3</sup>  |                        |                       |
|                                       | <i>Never</i>                         |                            | 0.99 [0.93-1.05]        | 6.99x10 <sup>-1</sup>  | 0.98 [0.92-1.04]       | 4.80x10 <sup>-1</sup>  | 0.97 [0.91-1.03]       | 3.32x10 <sup>-1</sup>  | 0.97 [0.91-1.03]       | 3.32x10 <sup>-1</sup>  | 0.97 [0.91-1.03]       | 3.24x10 <sup>-1</sup>  |                        |                       |
| BMI (kg/m <sup>2</sup> ) (ref. <25)   | <i>[25,30[</i>                       |                            | 1.10 [1.04-1.17]        | 1.05x10 <sup>-3</sup>  | 1.05 [0.99-1.12]       | 1.15x10 <sup>-1</sup>  | 1.01 [0.95-1.08]       | 7.93x10 <sup>-1</sup>  | 1.01 [0.95-1.08]       | 7.93x10 <sup>-1</sup>  | 1.01 [0.95-1.08]       | 8.07x10 <sup>-1</sup>  |                        |                       |
|                                       | <i>[30,40[</i>                       |                            | 1.10 [1.06-1.15]        | 4.87x10 <sup>-6</sup>  | 1.06 [1.02-1.11]       | 6.79x10 <sup>-3</sup>  | 1.03 [0.98-1.07]       | 2.61x10 <sup>-1</sup>  | 1.02 [0.98-1.07]       | 2.61x10 <sup>-1</sup>  | 1.02 [0.98-1.07]       | 2.74x10 <sup>-1</sup>  |                        |                       |
|                                       | <i>&gt;=40</i>                       |                            |                         |                        |                        |                        |                        |                        |                        |                        |                        |                        |                        |                       |
| B                                     | Cholesterol (mmol/L)                 |                            |                         |                        |                        |                        |                        | 0.83 [0.78-0.89]       | 3.71x10 <sup>-8</sup>  | 0.89 [0.82-0.96]       | 2.73x10 <sup>-3</sup>  | 0.89 [0.82-0.96]       | 2.77x10 <sup>-3</sup>  |                       |
|                                       | HDL cholesterol (mmol/L)             |                            |                         |                        |                        |                        |                        | 1.06 [0.99-1.14]       | 1.05x10 <sup>-1</sup>  | 1.06 [0.99-1.14]       | 1.13x10 <sup>-1</sup>  | 1.06 [0.99-1.15]       | 1.06x10 <sup>-1</sup>  |                       |
|                                       | Triglycerides (mmol/L)               |                            |                         |                        |                        |                        |                        | 1.01 [0.94-1.07]       | 8.63x10 <sup>-1</sup>  | 0.99 [0.92-1.05]       | 6.66x10 <sup>-1</sup>  | 0.98 [0.92-1.05]       | 6.49x10 <sup>-1</sup>  |                       |
|                                       | Vitamin D (nmol/L)                   |                            |                         |                        |                        |                        |                        | 0.89 [0.84-0.94]       | 6.49x10 <sup>-5</sup>  | 0.90 [0.85-0.95]       | 2.88x10 <sup>-4</sup>  | 0.90 [0.85-0.95]       | 2.75x10 <sup>-4</sup>  |                       |
|                                       | Cystatin C (mg/L)                    |                            |                         |                        |                        |                        |                        | 1.15 [1.11-1.18]       | 3.29x10 <sup>-22</sup> | 1.12 [1.08-1.15]       | 2.66x10 <sup>-13</sup> | 1.12 [1.08-1.15]       | 2.42x10 <sup>-13</sup> |                       |
| M                                     | Cancer (ref. No)                     | <i>Yes</i>                 |                         |                        |                        |                        |                        |                        |                        | 1.23 [1.18-1.28]       | 2.29x10 <sup>-23</sup> | 1.23 [1.18-1.28]       | 2.44x10 <sup>-23</sup> |                       |
|                                       | Cardiovascular (ref. No)             | <i>Yes</i>                 |                         |                        |                        |                        |                        |                        |                        | 1.17 [1.12-1.23]       | 4.10x10 <sup>-12</sup> | 1.17 [1.12-1.23]       | 4.47x10 <sup>-12</sup> |                       |
|                                       | Hypertension (ref. No)               | <i>Yes</i>                 |                         |                        |                        |                        |                        |                        |                        | 1.01 [0.95-1.07]       | 7.59x10 <sup>-1</sup>  | 1.01 [0.95-1.07]       | 7.56x10 <sup>-1</sup>  |                       |
|                                       | Diabetes (ref. No)                   | <i>Yes</i>                 |                         |                        |                        |                        |                        |                        |                        | 1.09 [1.05-1.14]       | 1.23x10 <sup>-5</sup>  | 1.09 [1.05-1.14]       | 1.21x10 <sup>-5</sup>  |                       |
|                                       | Respiratory (ref. No)                | <i>Yes</i>                 |                         |                        |                        |                        |                        |                        |                        | 1.15 [1.10-1.20]       | 1.80x10 <sup>-9</sup>  | 1.15 [1.10-1.20]       | 2.21x10 <sup>-9</sup>  |                       |
|                                       | Autoimmune (ref. No)                 | <i>Yes</i>                 |                         |                        |                        |                        |                        |                        |                        | 1.06 [1.02-1.11]       | 7.71x10 <sup>-3</sup>  | 1.06 [1.02-1.11]       | 7.58x10 <sup>-3</sup>  |                       |
|                                       | ACE inhibitors                       | <i>Yes</i>                 |                         |                        |                        |                        |                        |                        |                        | 1.07 [1.02-1.12]       | 2.85x10 <sup>-3</sup>  | 1.07 [1.02-1.12]       | 2.87x10 <sup>-3</sup>  |                       |
|                                       | Angiotensin II RB                    | <i>Yes</i>                 |                         |                        |                        |                        |                        |                        |                        | 1.03 [0.99-1.07]       | 1.20x10 <sup>-1</sup>  | 1.03 [0.99-1.07]       | 1.18x10 <sup>-1</sup>  |                       |
|                                       | Oral steroid                         | <i>Yes</i>                 |                         |                        |                        |                        |                        |                        |                        | 1.00 [0.97-1.04]       | 8.23x10 <sup>-1</sup>  | 1.00 [0.97-1.04]       | 8.24x10 <sup>-1</sup>  |                       |
|                                       | Statin                               | <i>Yes</i>                 |                         |                        |                        |                        |                        |                        |                        | 0.93 [0.88-0.98]       | 1.11x10 <sup>-2</sup>  | 0.93 [0.88-0.98]       | 1.12x10 <sup>-2</sup>  |                       |
|                                       | E                                    | NOx (ug/m <sup>3</sup> )   |                         |                        |                        |                        |                        |                        |                        |                        |                        |                        | 1.05 [0.95-1.16]       | 3.66x10 <sup>-1</sup> |
| PM10 (ug/m <sup>3</sup> )             |                                      |                            |                         |                        |                        |                        |                        |                        |                        |                        |                        | 1.03 [0.96-1.10]       | 3.87x10 <sup>-1</sup>  |                       |
| PM2.5 (absorbance/m)                  |                                      |                            |                         |                        |                        |                        |                        |                        |                        |                        |                        | 0.93 [0.86-1.00]       | 5.74x10 <sup>-2</sup>  |                       |
| PM2.5 (ug/m <sup>3</sup> )            |                                      |                            |                         |                        |                        |                        |                        |                        |                        |                        |                        | 1.00 [0.91-1.11]       | 9.34x10 <sup>-1</sup>  |                       |
